1 **RAREFAN: a webservice to identify REPINs and RAYTs in bacterial genomes**

2 Carsten Fortmann-Grote, Julia Balk and Frederic Bertels

3

4 Max-Planck-Institute for Evolutionary Biology, Department of Microbial Population Biology

5

6

7 Corresponding author: Frederic Bertels, August-Thienemann-Straße 2, 24306 Plön, Germany,

8 bertels@evolbio.mpg.de.

9

10

11

12 Running title: REPIN/RAYT Finder and ANalyzer

13

14 Keywords: sequence analysis – mobile genetic elements – bacterial genomes –

15 *Stenotrophomonas maltophilia*

16

17 **Abstract**

18 **Compared to eukaryotes, repetitive sequences are rare in bacterial genomes and usually do**  
19 **not persist for long. Yet, there is at least one class of persistent prokaryotic mobile genetic**  
20 **elements: REPINs. REPINs are non-autonomous transposable elements replicated by single-**  
21 **copy transposases called RAYTs. REPIN-RAYT systems are mostly vertically inherited and have**  
22 **persisted in individual bacterial lineages for millions of years. Discovering and analyzing REPIN**  
23 **populations and their corresponding RAYT transposases in bacterial species can be rather**  
24 **laborious, hampering progress in understanding REPIN-RAYT biology and evolution. Here we**  
25 **present RAREFAN, a webservice that identifies REPIN populations and their corresponding**  
26 **RAYT transposase in a given set of bacterial genomes. We demonstrate RAREFAN’s capabilities**  
27 **by analyzing a set of 49 *Stenotrophomonas maltophilia* genomes, containing nine different**  
28 **REPIN-RAYT systems. We guide the reader through the process of identifying and analyzing**  
29 **REPIN-RAYT systems across *S. maltophilia*, highlighting erroneous associations between REPIN**  
30 **and RAYTs, and provide solutions on how to find correct associations. RAREFAN enables rapid,**  
31 **large-scale detection of REPINs and RAYTs, and provides insight into the fascinating world of**  
32 **intragenomic sequence populations in bacterial genomes.**

33

## 34 Introduction

35 Repetitive sequences in bacteria are rare compared to most eukaryotic genomes. In eukaryotic  
36 genomes, repetitive sequences are the result of the activities of persistent parasitic transposable  
37 elements. In bacteria, in contrast, parasitic transposable elements cannot persist for long periods  
38 of time (Park *et al.* 2021; van Dijk *et al.* 2022). To persist in the gene pool, transposable elements  
39 have to constantly infect novel hosts (Sawyer *et al.* 1987; Lawrence *et al.* 1992; Bichsel *et al.*  
40 2010; Rankin *et al.* 2010; Wu *et al.* 2015; Park *et al.* 2021). Yet, there is at least one exception: a  
41 class of transposable elements called REPINs.

42

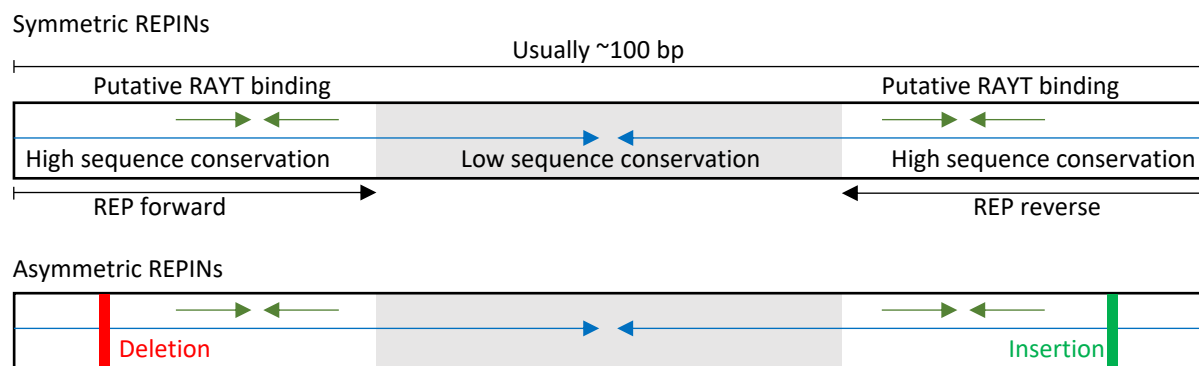

43

**Figure 1. The structure of symmetric and asymmetric REPINs.** A typical REPIN consists of two highly conserved regions at the 5' and 3' end of the REPIN (white), separated by a spacer region of lower sequence conservation (grey). The entire REPIN is a palindrome (blue arrows), which means it can form hairpin structures in single stranded DNA or RNA. Each 5' and 3' region contains a nested imperfect palindrome, which is referred to as REP (repetitive extragenic palindromic) sequence and has first been described in *Escherichia coli* (Higgins *et al.* 1982). REPINs can be either symmetric or asymmetric. Asymmetric REPINs have a deletion and a corresponding insertion in the highly conserved 5' or 3' end, which leads to “bubbles” in the hairpin structure. REPINs in *E. coli* are asymmetric, which makes analyses with RAREFAN more challenging. Figure adapted from (Bertels, Rainey 2022).

44

45 REPINs are short (~100 bp) nested palindromic sequences (**Figure 1**) that consist of two inverted  
46 REP (repetitive extragenic palindromic (Higgins *et al.* 1982)) sequences that can be present  
47 hundreds of times per genome (Bertels, Rainey 2011a). Most REPINs are symmetric where the 5'  
48 REP sequences is identical to the 3' REP sequences, with the occasional substitution (Bertels,

49 Rainey 2011a; b). However, there are also asymmetric REPINs where the 5' REP sequence differs  
50 from the 3' REP sequence by a point deletion or insertion (Bertels, Rainey 2011a, 2022), which  
51 makes the analysis and detection significantly more difficult (*e.g.*, *Escherichia coli* REPINs).  
52 Isolated REP sequences, REP singlets can also be found in the genome. These sequences are  
53 decaying remnants of REPINs that are not mobile anymore (Bertels, Rainey 2011a). REPINs are  
54 non-autonomous mobile genetic elements, which means they require a RAYT (**REP Associated**  
55 **tYrosine Transposase**) transposase gene (also referred to as  $tnpA_{REP}$ ) to replicate inside the  
56 genome (Nunvar *et al.* 2010; Bertels, Rainey 2011a; Ton-Hoang *et al.* 2012).

57

58 Within a genome, each REPIN population is usually only associated to a single RAYT gene. Hence,  
59 RAYT genes occur only in single copies per genome and do not copy themselves, unlike for  
60 example insertion sequences where often multiple identical sequences are present inside the  
61 genome. Unlike insertion sequences RAYT genes are also only inherited vertically, meaning they  
62 are host-beneficial transposases that are coopted by the host (Bertels, Gallie, *et al.* 2017; Bertels,  
63 Rainey 2022). The fact that REPINs and their corresponding RAYT genes are confined to a single  
64 bacterial lineage makes them very special, in comparison to all other parasitic mobile genetic  
65 elements in bacterial genomes (Bertels, Rainey 2022).

66

67 Of a total of five different RAYT families, there are only two RAYT families that are associated  
68 with REPINs: Group 2 and Group 3 RAYTs (Bertels, Gallie, *et al.* 2017). Group 2 RAYTs are present  
69 in most Enterobacteria and usually occur only once per genome associated with a single REPIN  
70 population. In contrast, Group 3 RAYTs are found in most *Pseudomonas* species and are usually  
71 present in multiple divergent copies per genome, each copy associated with a specific REPIN  
72 population (Bertels, Gallie, *et al.* 2017).

73

74 REPINs and their corresponding RAYT genes occur exclusively in bacterial genomes and are  
75 absent in eukaryotic or archaeal genomes (Bertels, Gallie, *et al.* 2017; Bertels, Rainey 2022).  
76 Within bacterial genomes REPINs and RAYTs have been evolving in single bacterial lineages for

77 millions maybe even for a billion years (Bertels, Gallie, *et al.* 2017). The long term persistence of  
78 REPINs in single bacterial lineages can also be observed when analyzing REPIN populations  
79 (Bertels, Gokhale, *et al.* 2017; Bertels, Rainey 2022).

80

81 Parasitic insertion sequences usually occur in identical copies in bacterial genomes reflecting the  
82 fact that insertion sequences persist only briefly in the genome before they are eradicated from  
83 the genome or kill their host (Park *et al.* 2021). REPINs in contrast are only conserved at the ends  
84 of the sequence (presumably due to selection for function), the rest of the sequence is highly  
85 variable and only the hairpin structure is conserved (Bertels, Rainey 2011a). The sequence  
86 variability of REPINs within the same genome reflects their long-term persistence in single  
87 bacterial lineages (Bertels, Rainey 2022). REPINs cannot simply reinfect another bacterial lineage  
88 since they rely for mobility on their corresponding RAYT, which itself is immobile.

89

90 RAYTs and REPINs are distinct from typical parasitic insertion sequences, yet we know very little  
91 about their evolution or biology. Currently, it is completely unclear what kind of beneficial  
92 function maintains REPINs and RAYTs for millions of years in the genome. The reason for our lack  
93 of knowledge is not because REPINs and RAYTs are rare. They are ubiquitously found in many  
94 important and well-studied model bacteria such as Enterobacteria, Pseudomonads, Neisseriads,  
95 Xanthomonads. Microbial molecular biologists presumably encounter REPINs quite frequently.  
96 However, connecting the presence or absence of REPINs/RAYTs with phenotypes is difficult if we  
97 do not know when it is a REPIN that is present close to a gene of interest or a different type or  
98 repeat sequence. Even if the scientist knows about the presence of a REPIN it is probably also  
99 important to know whether a corresponding RAYT is present, since the function of REPINs largely  
100 depends on the function of the presence of a corresponding RAYT gene (Bertels, Rainey 2022).

101

102 Yet, the identification of REPIN populations and their corresponding RAYTs can be rather  
103 cumbersome if done from scratch. This is particularly true if the microbial molecular biologist is  
104 not aware of all the ins and outs of REPIN and RAYT biology. Identifying REPINs starts with an

105 analysis of short repetitive sequences in the genome. If there are excessively abundant short  
106 sequences present in the genome, the distribution of these sequences is analyzed next. If they  
107 are exclusively identical tandem repeats without sequence variation and present in only one or  
108 two loci in the genome then these sequences are probably part of a CRISPR array and not REPINs.

109

110 Here, we present RAREFAN (RAYT/REPIN Finder and Analyzer), a webservice that automates the  
111 identification of REPINs and their corresponding RAYTs. RAREFAN is publicly accessible at  
112 <http://rarefan.evolbio.mpg.de> and identifies REPIN populations and RAYTs inside a set of  
113 bacterial genomes. RAREFAN also generates graphs to visualize the population dynamics of  
114 REPINs, and assigns RAYT genes to their corresponding REPIN groups. Here we will demonstrate  
115 RAREFAN's functionality by analyzing REPIN-RAYT systems in the bacterial species  
116 *Stenotrophomonas maltophilia*.

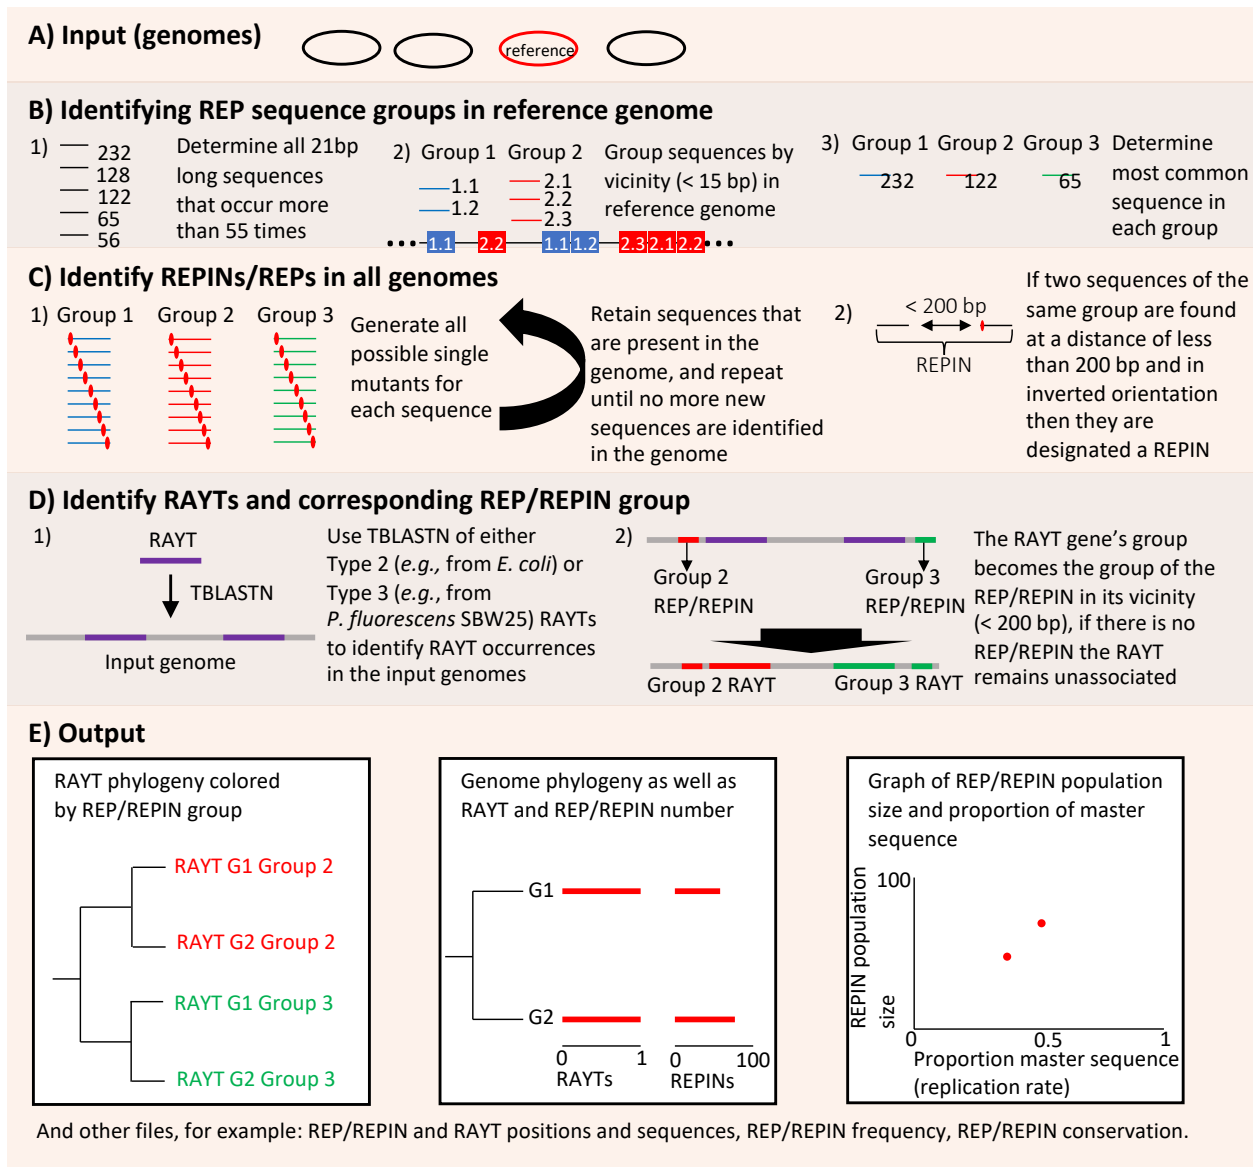

**Figure 2. RAREFAN workflow.** (a) By default RAREFAN requires the user to supply input sequences containing RAYTs and REPINS. These are fully sequenced and complete genomes. (b) RAREFAN then identifies seed sequence groups (potential REP sequences) in the reference genome by first isolating all 21 bp (adjustable parameter) long sequences that occur more than 55 times (adjustable parameter) in the reference genome. It is likely that a large number of these sequences belong to the same REPIN sequence type since the conserved part of REPINS is longer than 20bp. Hence, we grouped all sequences together that occur within 15 bp (adjustable parameter) of each other anywhere in the genome. For example, if 'sequence 1' occurs 55 times and 'sequence 2' occurs 42 times then only one of these occurrences of 'sequence 1' needs to be within 15 bp of 'sequence 2' in order to be sorted into the same sequence group. All further analyses are performed only with the most common sequence in each sequence group. This sequence will be called seed sequence. (c) The occurrences of the seed and mutated seed sequences are identified in all submitted genomes. If a mutated seed sequence is identified in a genome, then all single mutants of that seed sequence are searched recursively in the same

genome. All identified sequences that occur within 130 bp in inverted orientation of each other are designated REPINs. All other identified seed sequences and mutated seed sequences are REP singlets. (d) TBLASTN is used to identify RAYT homologs (e-Value < 1e-30, adjustable parameter) of either *E. coli* (Group 2 RAYT) or from *Pseudomonas fluorescens* SBW25 (Group 3 RAYT) across all submitted genomes. If a RAYT homolog is in the vicinity (default 200 bp, adjustable parameter) of a previously identified REPIN or REP singlet, then this RAYT is designated as associated with this REPIN group. (e) The first graph contains a RAYT phylogeny computed from a nucleotide alignment of all identified RAYT genes. The alignment is calculated with MUSCLE (Edgar 2004) and a phylogeny with PHYML (Guindon *et al.* 2010). The RAYT phylogeny indicates what RAYTs are associated with what REPIN populations (largest sequence cluster calculated with MCL) via colour coding. In a second graph the abundance of each REPIN population and RAYT copy number are displayed on a genome phylogeny. If no genome phylogeny is supplied RAREFAN calculates a whole genome phylogeny of the submitted genomes using *andi* (Haubold *et al.* 2015). In the last graph REPIN population sizes are plotted in relation to the proportion of master sequences. Master sequences are the most abundant REPIN in each population. The REPIN population is the largest sequence cluster that is formed by REPIN sequences (REP sequences are excluded). The largest sequence cluster is identified by applying MCL with an inflation parameter of 1.2 to a sequence matrix where only sequences are connected that differ in exactly one position (Van Dongen 2000). RAREFAN also generates various files containing, for example, REP, REPIN, or RAYT sequences and their positions in the query genomes.

## 117 **Methods**

### 118 *Implementation*

119 RAREFAN is a modular webservice. It consists of a web frontend written in the python  
120 programming language (Van Rossum, Drake Jr 1995) using the flask framework (Grinberg 2018),  
121 a java (Arnold *et al.* 2005) backend for genomic sequence analysis and an R (R Core Team 2016)  
122 shiny app (RStudio, Inc 2013) for data visualization. The software is developed and tested on the  
123 Debian GNU/Linux operating system (Kleinmann *et al.* 2021). All components are released under  
124 the MIT opensource license (Initiative 2021) and can be obtained from our public GitHub  
125 repository at <https://github.com/mpievolbio-scicomp/rarefan>.

126 The public RAREFAN instance at <http://rarefan.evolbio.mpg.de> runs on a virtual cloud server with  
127 4 single-threaded CPUs and 16GB of shared memory provided and maintained by the Gesellschaft  
128 für Wissenschaftliche Datenverarbeitung Göttingen (GWDG) and running the Debian GNU/Linux  
129 Operating System (Kleinmann *et al.* 2021).



130 The java backend drives the sequence analysis. It makes system calls to TBLASTN (Altschul *et al.*  
131 1990) to identify RAYT homologs and to MCL (Van Dongen 2000) for clustering REPIN sequences  
132 in order to determine REPIN populations.

133 Jobs submitted through the web server are queued and executed as soon as the required  
134 resources become available. Users are informed about the status of their jobs. After job  
135 completion, the user can trigger the R shiny app to visualize the results.

136 The java backend can also be run locally *via* the command line interface (available for download  
137 at <https://github.com/mpievolbio-scicomp/rarefan/releases>).

### 138 *Usage of the webservice*

139 The front page of our webservice allows users to upload their bacterial genomes in FASTA (.fas)  
140 format (**Figure 2A**). Optionally, users may also provide RAYT protein FASTA sequences (.faa) or  
141 phylogenies in NEWICK (.nwk) format. After successful completion of the upload process, the  
142 user fills out a web form to specify the parameters of the algorithm:

- 143 • Reference sequence: Which of the uploaded genome sequences will be designated as  
144 reference genome (see below for explanations). Defaults to the first uploaded filename  
145 in alphabetical order.
- 146 • Query RAYT: The RAYT gene that is used to identify homologous RAYTs in the query  
147 genomes.
- 148 • Tree file: A phylogenetic tree of the reference genomes that can be provided by the user,  
149 otherwise the tree will be calculated using *andi* (Haubold *et al.* 2015).
- 150 • Minimum seed sequence frequency: Lower limit on seed sequence frequency in the  
151 reference genome to be considered as a REP candidate. Default is 55.
- 152 • Seed sequence length: The seed sequence length (in base pairs) is used to identify REPIN  
153 candidates from the input genomes. Default is 21 bp.
- 154 • Distance group seeds: The maximum distance between a single occurrence of short  
155 repetitive sequences to still be sorted into the same sequence group.

- 156 • Association distance REPIN-RAYT: The maximum distance at which a REP sequence can  
157 be located from a RAYT gene to be linked to that RAYT gene.
- 158 • e-value cut-off: Alignment e-value cut-off for identifying RAYT homologs with TBLASTN.  
159 Default is 1e-30.
- 160 • Analyse REPINs: Ticked REPINs will be analysed (two inverted REP sequences found at a  
161 distance of less than 130 bp), if not ticked only short repetitive 21 bp long sequence will  
162 be analysed.
- 163 • User email (optional): If provided, then the user will be notified by email upon run  
164 completion.

165 The job is then ready for submission to the job queue. Upon job completion, links to browse and  
166 to download the results, as well as a link to a visualization dashboard are provided. If a job runs  
167 for a long time then users may also come back to RAREFAN at a later time, query their job status  
168 and eventually retrieve their results by entering the run ID into the search field at  
169 <http://rarefan.evolbio.mpg.de/results>. Relevant links and the run ID are communicated either on  
170 the status site or by email if the user provided their email address during run configuration. Runs  
171 are automatically deleted from the server after six months.

#### 172 *Identification of REPs and REPINs*

173 The algorithm to determine REP sequence groups has been described in previous papers and is  
174 slightly improved (Bertels, Rainey 2011a, 2022; Bertels, Gokhale, *et al.* 2017). In our current  
175 implementation REPs/REPIN populations are now automatically linked to RAYT genes.

176 First, all N bp (21 bp by default) long seed sequences that occur more than M times (55 by default)  
177 are extracted from the reference genome. N and M are the seed sequence length and minimum  
178 seed sequence frequency, respectively (**Figure 2B**). All sequences occurring within the reference  
179 genome at least once within 15 bp of each other are then grouped together into n REP sequence  
180 groups (numbered 0-(n-1)). The most common sequence in each group, named REP seed  
181 sequence, is used for further analyses in each input genome.

182 In the next step all possible point mutants of the seed sequences are generated and searched for  
183 in the genome (**Figure 2C**). If a sequence is found in the genome, then all possible point mutations

184 are generated for this sequence as well and so on until no more sequences can be identified. If  
185 two sequences are found within 130 bp of each other in inverted orientation, then these are  
186 designated REPINs.

187 Among all identified REP and REPIN sequences REPIN populations can be isolated. REPIN  
188 populations are determined by applying MCL using an inflation parameter of 1.2 (Van Dongen  
189 2000) to a network of REP/REPIN sequences where all sequences that differ by exactly one  
190 nucleotide are connected. The clustering results are stored in a file ending in `.mcl`. The  
191 sequences of the largest REPIN population (excluding REP singlets) are isolated in a file ending in  
192 `largestCluster.nodes`. The largest REPIN populations are shown in the REPIN population  
193 plot and the master sequence correlation plot (**Figure 4**).

194

#### 195 *Identification of RAYTs*

196 RAYTs are identified using TBLASTN (Camacho *et al.* 2009) with either a protein sequence  
197 provided by the user, a Group 2 RAYT from *E. coli* (yafM, Uniprot accession Q47152) or a Group  
198 3 RAYT from *P. fluorescens* SBW25 (yafM, Uniprot accession C3JZZ6). The presence of RAYTs in  
199 the vicinity (default 200 bp) of a particular REPIN can be used to establish the association  
200 between the RAYT gene and a REPIN group (**Figure 2D**). All positions of all REPINs and REP  
201 sequences of a REPIN group are checked whether they occur within 200 bp (by default) of a RAYT  
202 gene. If so then the RAYT gene is linked to the REPIN group in the file  
203 `repin_rayt_association.txt`.

#### 204 *Visualizations*

205 For each REPIN-RAYT group summary plots are generated. These include plots showing the RAYT  
206 phylogeny (calculated from a nucleotide alignment using MUSCLE (Edgar 2004) and PHYML  
207 (Guindon *et al.* 2010) to generate a phylogeny), REPIN population sizes in relation to the genome  
208 phylogeny (provided by the user or if not provided calculated by *andi* (Haubold *et al.* 2015)) as  
209 well as the proportion of master sequences (most common REPIN in a REPIN population) in  
210 relation to REPIN population size (**Figure 2E**).

## 211 *Other outputs*

212 Identified REPINs, REP singlets as well as RAYTs are written to FASTA formatted sequence files  
213 and to tab formatted annotation files that can be read with the Artemis genome browser  
214 (Rutherford *et al.* 2000). The REPIN-RAYT associations as well as the number of RAYT copies per  
215 genome are written to tabular data files. A detailed description of all output files is provided in  
216 the manual (<http://rarefan.evolbio.mpg.de/manual>) and in the file “readme.md” in the output  
217 directory.

218

## 219 *Sequence analysis and annotation*

220 For verification of RAREFAN results, REPIN-RAYT-systems were analysed in their corresponding  
221 genomes using Geneious Prime version 2022.2.2 (Kearse *et al.* 2012). Nucleotide sequences and  
222 positions of REP singlets, REPINs, and RAYTs were extracted from output files generated by  
223 RAREFAN and mapped in the relevant *S. maltophilia* genome. Complete RAREFAN data used for  
224 analysis can be accessed by using the run IDs listed in **Table 1**.

225

226 **Table 1. RAREFAN IDs linking to the raw data of the presented analyses.**

| Run ID                   | Reference genome                  |
|--------------------------|-----------------------------------|
| <a href="#">1a8l7wu</a>  | <i>S. maltophilia</i> Sm53        |
| <a href="#">mknhxp8</a>  | <i>S. maltophilia</i> AA1         |
| <a href="#">pgfmaxx5</a> | <i>S. maltophilia</i> FDAARGO_649 |
| <a href="#">yy72i755</a> | <i>S. maltophilia</i> AB550       |
| <a href="#">78eu9zl0</a> | <i>S. maltophilia</i> ISMMS3      |

227 Associated data can accessed by entering the run ID at <http://rarefan.evolbio.mpg.de/results>.

228

## 229 **Results**

230 RAREFAN can identify REPINs and their corresponding RAYTs in a set of fully sequenced bacterial  
231 genomes. The RAREFAN algorithm has been used in previous analyses to identify and  
232 characterize REPINs and RAYTs in Pseudomonads (Bertels, Rainey 2011a, 2022), Neisseriads  
233 (Bertels, Rainey 2022), and Enterobacteria (Bertels, Gallie, *et al.* 2017; Park *et al.* 2021). To  
234 demonstrate RAREFAN’s capabilities, we are presenting an analysis of 49 strains belonging to the  
235 opportunistic pathogen *S. maltophilia*.

236 *S. maltophilia* strains contain Group 3 RAYTs, which are also commonly found in plant-associated  
237 *Pseudomonas* species such as *P. fluorescens* or *P. syringae* (Bertels, Rainey 2011a, 2022). Similar  
238 to Group 3 RAYTs in other species, *S. maltophilia* contains multiple REPIN-RAYT systems per  
239 genome. Group 2 RAYTs, in contrast, contain only ever one REPIN-RAYT system per genome  
240 (Bertels, Rainey 2022).

241

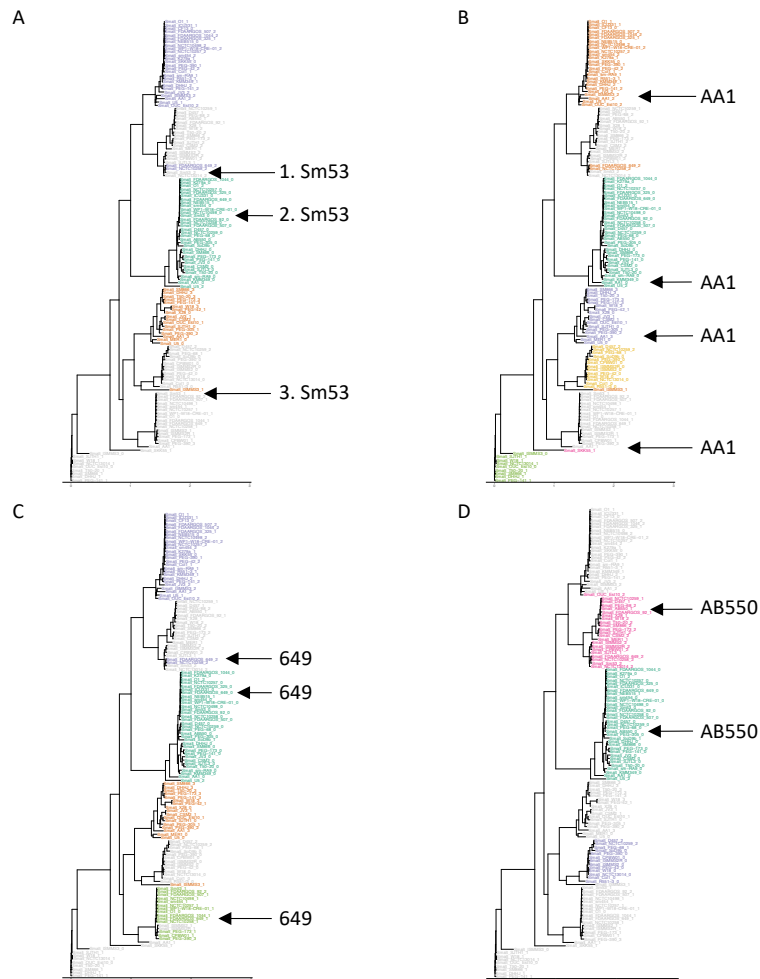

242

**Figure 3. Phylogenetic trees built from RAYT genes extracted from *S. maltophilia* genomes.** RAYT genes are coloured according to their association with REPIN populations in the reference genome. If a REPIN population of a query genome is not present in the reference genome, then the REPIN population cannot be identified in the query genome and the corresponding RAYT gene cannot be linked and is coloured in grey. The four panels **A-D** show phylogenies for four different reference strains. *S. maltophilia* strains Sm53, AA1, 649 and AB550 were used in panels **A** to **D**, respectively. Locations of a reference strain's RAYT genes in the tree are indicated by arrows. An association between almost all RAYTs and REPIN populations could be made by using four

different reference genomes. Most of the RAYT genes are coloured (associated to a REPIN group) in at least one of the trees. The three numbered RAYT genes from the Sm53 RAREFAN run are referenced in the text.

243

244 *Nine different REPIN-RAYT systems in S. maltophilia*

245 REPIN-RAYT systems in *S. maltophilia* are surprisingly diverse compared to other species. For  
246 example, *Pseudomonas chlororaphis* contains three separate REPIN populations that are present  
247 in all *P. chlororaphis* strains, each associated with its cognate RAYT gene (Bertels, Rainey 2022).  
248 *S. maltophilia*, in contrast, contains only one REPIN-RAYT system that is present across almost  
249 the entire species (green clade in **Figure 3**), and at least eight REPIN-RAYT systems that are  
250 present in subsets of strains (nine clades in **Figure 5**).

251 The patchy presence-absence pattern of REPIN-RAYT systems in *S. maltophilia*, makes the dataset  
252 quite challenging to analyse. If a REPIN population is not present in the reference strain then  
253 RAREFAN will not be able to detect it in any other strain. Yet, it is possible to detect RAYT genes  
254 in all strains of a species independent of the reference strain selection. RAYT genes that are not  
255 associated to a REPIN population are displayed in grey (**Figure 3A**). While these RAYT genes are  
256 not associated to REPIN populations detected in the reference strain, they might still be  
257 associated with a yet unidentified REPIN type present in the genome the unassociated RAYT gene  
258 is located in.

259 In order to identify all REPIN populations across a species, we suggest to perform multiple  
260 RAREFAN runs with different reference strains. The RAREFAN web interface supports re-  
261 launching a given job with modified parameters. To identify as many different REPIN-RAYT  
262 systems as possible in each subsequent run the reference should be set to a genome that  
263 contains RAYTs that were not associated with a REPIN population previously (*i.e.*, genomes  
264 containing grey RAYTs in **Figure 3**). However, this strategy may also fail when the REPIN  
265 population size falls below the RAREFAN seed sequence frequency threshold.

266 For example, *S. maltophilia* Sm53 contains three RAYTs only one of which is associated with a  
267 REPIN population (RAYT genes indicated in **Figure 3A**). However, the remaining two RAYTs are  
268 indeed associated with a REPIN population, but these REPIN populations are too small to be

269 detected in *S. maltophilia* Sm53 (the seed sequence frequency threshold is set to 55 by default).  
 270 In other *S. maltophilia* strains the REPIN populations are large enough to exceed the threshold.  
 271 For example, if *S. maltophilia* AB550 is set as reference, RAYT number 1 from Sm53 (**Figure 3A**) is  
 272 associated with the pink REPIN population (**Figure 3D**). If *S. maltophilia* 649 is set as reference  
 273 RAYT number 3 from Sm53 (**Figure 3A**) is associated with the light green REPIN population (**Figure**  
 274 **3C**). RAYTs from the bottom clade are only associated with REPIN populations when *S. maltophilia*  
 275 AA1 is chosen as reference (**Figure 3B**). While lower thresholds can guarantee that all REPINs will  
 276 be identified in the genome, the number of sequence groups that are not REPINs quickly  
 277 explodes. Especially for genomes that contain large numbers of mobile genetic elements or  
 278 CRISPRs (Bertels, Rainey 2022).

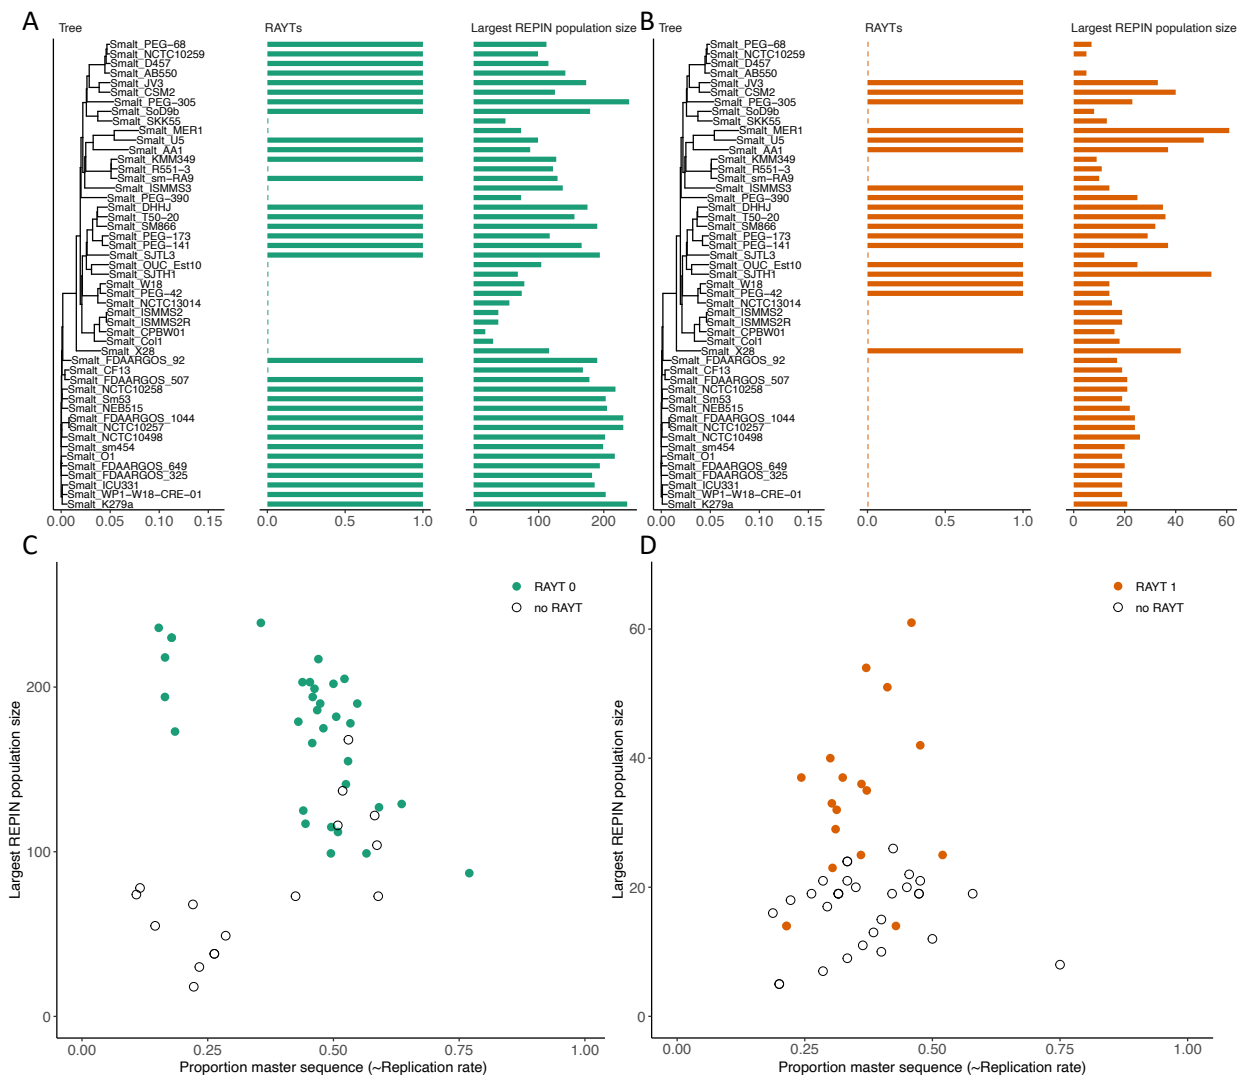

**Figure 4. REPIN population sizes and conservation.** The plots show two REPIN populations and their associated RAYTs that were identified in *S. maltophilia* using *S. maltophilia* Sm53 as reference. **(A)** The phylogenetic tree on the left side is a whole genome phylogeny generated by *andi* (Haubold *et al.* 2015). Shown on the right are REPIN population sizes (which is the largest REPIN cluster calculated by MCL) and the number of associated RAYTs sorted by the genome phylogeny. The green REPIN populations and associated RAYTs are present in most strains in high abundance (maximum of 239 occurrences in *S. maltophilia* K279a, left panel). **(B)** The orange population in contrast is present in much lower numbers (maximum of 61 occurrences in *S. maltophilia* MER1, right panel). Note, REPIN populations are assigned consistent colours based on their abundance in the reference genome. For example, the most abundant REPIN population in the reference is always coloured in green, and the second most abundant population is always coloured in orange. **(C and D)** Proportion of master sequence in *S. maltophilia* REPIN populations. The master sequence in a REPIN population is the most common REPIN sequence. In an equilibrium the higher the proportion of the master sequence in the population the higher the replication rate (Bertels, Gokhale, *et al.* 2017). The presence and absence of an associated RAYT is also indicated by the colours of the dots. Empty circles indicate that the REPIN population is not associated with a RAYT gene in that genome.

280 *RAREFAN visualizes REPIN population size and potential replication rate*

281 The RAREFAN webserver visualizes REPIN population size and RAYT numbers in barplots. Barplots  
282 are ordered by the phylogenetic relationship of the submitted bacterial strains (Yu *et al.* 2018).  
283 RAREFAN detects three populations when *S. maltophilia* Sm53 is selected as reference strain  
284 **(Figure 3A)**. The largest REPIN population (calculated by MCL from all REPINs of that type) has a  
285 corresponding RAYT gene in almost all strains (first barplot in **Figure 4A**) and most REPIN  
286 populations contain more than 100 REPINs (second barplot in **Figure 4A**). The second largest  
287 REPIN population in Sm53 (orange population in **Figure 4B**) is significantly smaller and contains  
288 no more than 61 REPINs in any strain and most strains do not contain a corresponding RAYT for  
289 this population.

290 RAREFAN also provides information on REPIN replication rate **(Figure 4C and D)**. REPIN replication  
291 rate can be estimated by dividing the number of the most common REPIN sequence (master  
292 sequence) by the REPIN population size if the population is in mutation selection balance (Bertels,  
293 Gokhale, *et al.* 2017). If a REPIN replicates very fast most of the population will consist of identical  
294 sequences because mutations do not have enough time to accumulate between replication  
295 events. Hence, the proportion of master sequences will be high in populations that have a high  
296 replication rate. Transposable elements such as insertion sequences consist almost exclusively of



297 identical master sequences because the time between replication events is not sufficient to  
298 accumulate mutations and because quick extinction of the element usually prevents the  
299 accumulation of mutations after replication (Park *et al.* 2021; Bertels, Rainey 2022). REPIN  
300 populations in contrast replicate slowly and persist for long periods of time, which means that a  
301 high proportion of master sequences suggests a high REPIN replication rate.

302 In *S. maltophilia* the proportion of master sequences in the population does not seem to correlate  
303 well with REPIN population size, both in the green and the orange population (**Figures 4C and D**).  
304 Similar observations have been made in *P. chlororaphis* (Bertels, Rainey 2022), and may suggest  
305 that an increase in population size is not caused by an increase in replication rate. Population size  
306 is likely to be more strongly affected by other factors such as the loss of the corresponding RAYT  
307 gene, which leads to the decay of the REPIN population. One could even speculate that high  
308 REPIN replication rates are more likely to lead to the eventual demise of the population due to  
309 the negative fitness effect on the host (Bertels, Rainey 2022).

310 The presence of RAYTs and the size of the corresponding REPIN population do correlate  
311 surprisingly well (**Figure 4A and B**, p-Value = 0.008 of the linear model of independent contrasts  
312 (Felsenstein 1985) of green RAYT and REPIN number, p-Value = 0.003 for orange REPIN  
313 populations). Green RAYTs are absent from an entire *S. maltophilia* clade (middle of **Figure 4A**).  
314 This clade has also lost a significant amount of green REPINs, and the proportion of the master  
315 sequences in these populations is low (**Figure 4C**). Similarly, genomes without orange RAYTs have  
316 smaller REPIN populations in the orange population than genomes with the corresponding RAYT  
317 (**Figure 4D**). A similar observation has been made previously in *E. coli*, *P. chlororaphis*, *N.*  
318 *meningitidis* and *N. gonorrhoeae* where the loss of the RAYT gene is followed by a decay of the  
319 associated REPIN population (Park *et al.* 2021; Bertels, Rainey 2022).

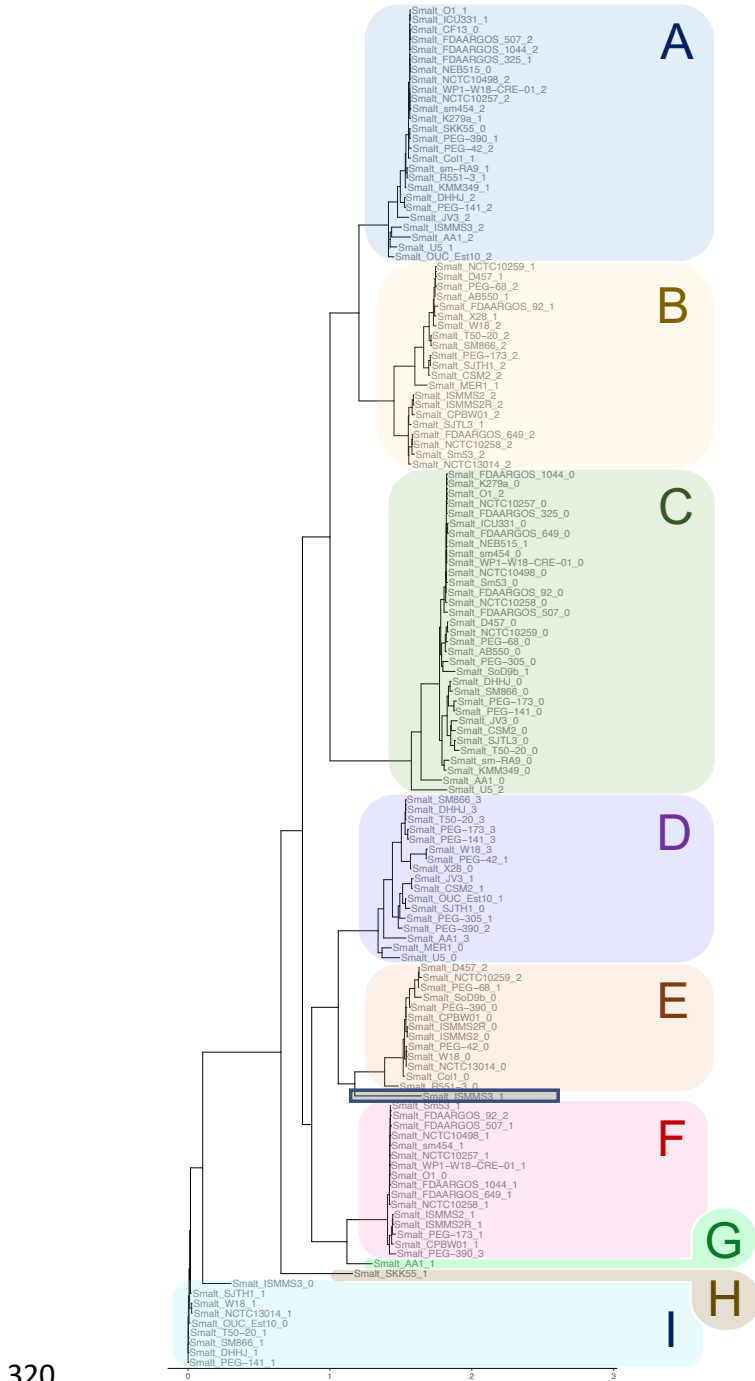

320

**Figure 5. Phylogeny of RAYT genes and their associated REPINs.** The tree shows RAYT genes from 49 *S. maltophilia* strains. Colours of clades A-I are assigned according to their association with a REPIN found within 130 bp of the RAYT gene (see **Table 2**). Except for a single RAYT gene ISMMS3\_1 (grey box), which could not be linked to a REPIN population.

321

**Table 2. REPIN palindromes associated with each RAYT clade.**

| RAYT population | REPIN palindromes |
|-----------------|-------------------|
|-----------------|-------------------|

---

|   |                    |
|---|--------------------|
| A | CCGACCAACGGTCGG    |
| B | CCAACCAAGGTTGGC    |
| C | CCGGCCAGCGGCCGG    |
| D | TCCACGCATGGCGTGGGA |
| E | CCGAGCCCATGCTCGG   |
| F | TCGACTAACAGTCGA    |
| G | TCGACCAACGGTCGA    |
| H | GCCGGGCATGGCCCGGC  |
| I | AGTCGAGCTTGCTCGACT |

---

322 Each RAYT clade from **Figure 5** is associated with a unique imperfect palindrome that is present  
323 at the 5' and/or 3' end of the RAYT gene.

324

325 *Linking REPIN populations with RAYT genes can be challenging*

326 Unfortunately, RAREFAN is not always able to link the correct REPIN population with the correct  
327 RAYT gene. In some RAREFAN runs associations between RAYTs and REPINs are not  
328 monophyletic, as for example the red RAYTs in **Figure 3A**. However, the same clade of RAYTs is  
329 uniformly coloured in yellow in **Figure 3D**, suggesting that the entire RAYT clade is associated  
330 with the same REPIN group.

331 An analysis of all REPIN groups that were identified by RAREFAN across four different RAREFAN  
332 runs (**Table 1**, one additional analysis was performed with ISMMS3) showed that there are a total  
333 of nine different REPIN groups, each defined by an individual central palindrome (**Table 2**). Each  
334 REPIN group is associated with a monophyletic RAYT group (**Figure 5**). Only a single RAYT is not  
335 associated with a REPIN population (ISMMS3\_1).

336 RAREFAN could not link a REPIN to the RAYT gene ISMMS3\_1 (**Figure 5**, grey box). While there is  
337 a sequence that resembles the A palindrome as well as variants of the C palindrome flanking both  
338 sides of the RAYT gene (**Supplementary Figure 2**), none of the sequences formed REPIN  
339 populations large enough to be identified by RAREFAN. Presumably the RAYT ISMMS3\_1, which

340 is only present in a single *S. maltophilia* strain, is at the early stages of establishing a REPIN  
341 population, and the REPIN population has not spread to a considerable size yet.

342 There are two more cases where RAREFAN failed to link RAYT genes with any REPINs (ISSMS2\_  
343 and ISSMS2R\_1, **Supplementary Figure 1 D and E**). Detailed sequence analyses showed that the  
344 respective REPINs are located at a distance of more than 130 bp (an adjustable parameter in  
345 RAREFAN). These REPINs are ignored by RAREFAN by default. However, this parameter can be  
346 adjusted manually and when set to a distance of 200 bp, RAREFAN correctly links these REPINs  
347 to the RAYT gene.

348 In three cases the wrong REPIN population was linked to a RAYT gene. In our dataset this can  
349 happen when RAYTs are flanked by seed sequences from two different REPIN populations  
350 (**Supplementary Figure 1 A-C**). A single REP sequence from the “wrong” (non-monophyletic  
351 RAYT) clade occurs together with multiple REP or REPIN sequences from the “right”  
352 (monophyletic in a different RAREFAN run) clade. REPINs are linked to the “wrong” RAYT when  
353 the correct REPIN population is absent in the chosen reference genome. This problem can be  
354 alleviated by performing analyses with multiple reference genomes and comparing the results.

355 *REPIN groups may be lost when the seed distance is too large*

356 The seed distance parameter determines whether two highly abundant sequences are sorted  
357 into the same or different REPIN groups (**Figure 2B**). If two REPINs from two different groups  
358 occur next to each other, at a distance of less than the seed distance parameter, then the two  
359 seeds are erroneously sorted into the same group. If two different REPIN groups are sorted into  
360 the same group then one of the groups will be ignored by RAREFAN, because only the most  
361 abundant seed in each group will be used to identify REPINs.

362 A manual analysis (*e.g.*, multiple sequence alignment) of sequences in the groupSeedSequences  
363 folder of the RAREFAN output can identify erroneously merged REPIN groups. In *S. maltophilia*,  
364 groups are separated well when the distance parameter is set to 15 bp and Sm53 is used as a  
365 reference. When the parameter is set to 30 bp instead, one of the REPIN groups will be missed  
366 by RAREFAN.

367 A small seed distance parameter will separate seed sequences belonging to the same REPIN  
368 group into different groups. Hence, RAREFAN will analyse the same REPIN group multiple times.  
369 While this will lead to increased RAREFAN runtimes, these errors, are easy to spot, because (1)  
370 the same RAYT gene will be associated to multiple REPIN groups, (2) the central palindrome  
371 between the group is identical and (3) the master sequence between the groups will be very  
372 similar.  
373

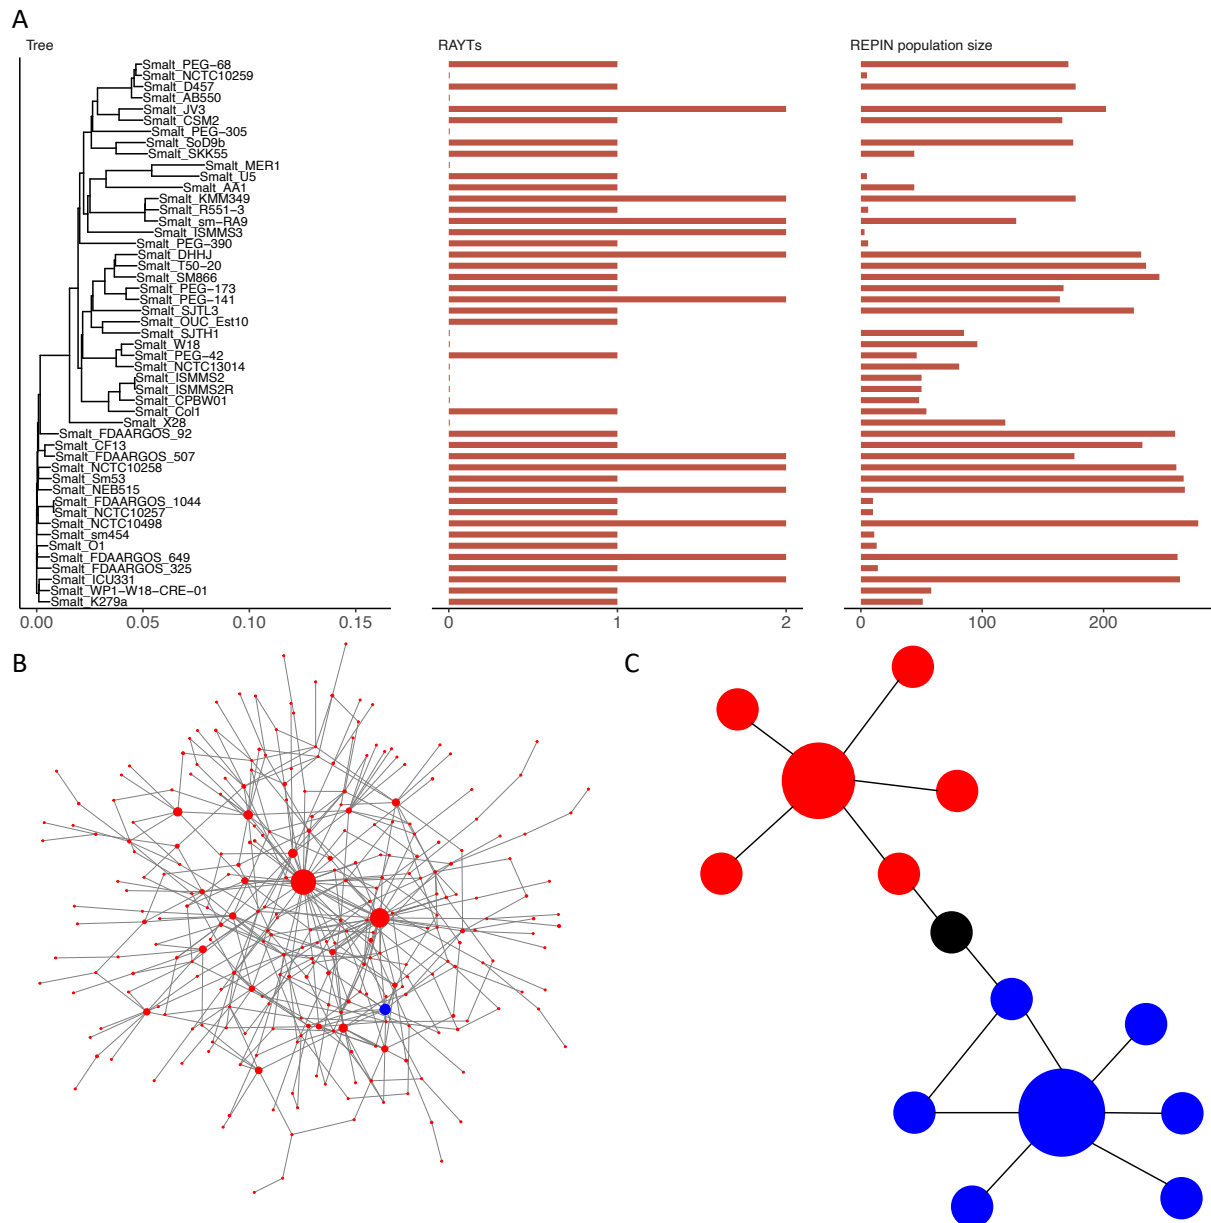

**Figure 6. Closely related REPIN populations may be merged by RAREFAN. (A)** REPIN group 2 identified in a *S. maltophilia* Sm53 RAREFAN run. The RAREFAN result suggests that REPIN group 2 is sometimes associated with two RAYTs. **(B)** A closer inspection of the data shows that Group 2 is a combination of two different REPIN groups, the “real” Group 2 and Group 0. The network shown, visualizes all REP sequences identified as Group 2. Nodes in the network represent 21 bp long REP sequences. Two nodes are connected if the sequences they represent differ by exactly one nucleotide. The node size indicates the abundance of the sequence in the genome. The blue node represents the most common Group 2 sequence, occurring 65 times in the genome. The largest red node occurs 407 times in the genome and resembles a Group 0 REP sequence. **(C)** Illustration of how small changes to a single sequence can connect two sequence cluster. The most common 21 bp long sequence in Group 0 differs in only four positions from the most common 21 bp long sequence in Group 2. There is a set of sequences that connects these two groups that only differ in exactly one position each (nodes connected by an edge), which passes through the black node. If there is such an unbroken path between REP sequences, then REPIN groups will be merged.

375

376 *Closely related REPIN groups may be merged into a single group by RAREFAN*

377 Incorrect merging of REPIN groups can occur when two REPIN groups are closely related. We  
378 identified merged REPIN groups in *S. maltophilia* because RAREFAN linked some REPIN groups  
379 with two RAYT genes in the same genome (**Figure 6A**). While REPIN groups linked to two RAYTs  
380 has been observed before in *Neisseria meningitidis* (Bertels, Rainey 2022), it is particularly  
381 unusual in *S. maltophilia* due to some key differences between REPIN-RAYT in the two bacterial  
382 species. First, RAYTs in *N. meningitidis* belong to Group 2 and RAYTs in *S. maltophilia* belong to  
383 Group 3 (Bertels, Gallie, *et al.* 2017), two very divergent RAYT groups. Second, RAYTs that are  
384 associated to the same REPIN group in *N. meningitidis* are almost identical, since they are copied  
385 by an insertion sequence *in trans* (Bertels, Rainey 2022), something that is not the case for *S.*  
386 *maltophilia*, where the two RAYTs are very distinct from each other (green and red clade in **Figure**  
387 **3A**, or clade A and C in **Figure 5**).

388 A closer inspection of all sequences identified in REPIN group 2 shows that it also contains  
389 sequences belonging to REPIN group 0 (palindromes linked to clade A and C in **Table 2**). The  
390 relationship between the sequences shows that there is a chain of sequences that all differ by at  
391 most a single nucleotide between the most abundant sequence in group 2 to the most abundant  
392 sequence in group 0 (**Figure 6B and C**). Hence, the reason group 0 and group 2 are merged is that

393 they are too closely related to each other and hybrids of the two REPIN groups exist. Because  
394 sequence groups are built by identifying all related sequences in the genome recursively, closely  
395 related groups (the REPIN group 0 seed only differs in four nucleotides from the REPIN group 2  
396 seed sequence) can be merged into a single REPIN group. REPIN population size and RAYT number  
397 are the sum of REPIN group 0 and 2. There are various possibilities to resolve this issue: (1)  
398 subtract sequences from group 0 (which does not contain group 2) from REPIN group 2; (2) use  
399 a different sequence seed from the group 2 seed collection in the seed sequence file  
400 (groupSeedSequences/Group\_Smalt\_Sm53\_2.out); (3) sometimes it may be possible to  
401 rerun RAREFAN with a different reference strain where the issue does not occur; or (4) increase  
402 the length of the seed sequence.

#### 403 *Performance*

404 We measured the elapsed time for a complete RAREFAN run for three different species and for  
405 5, 10, 20, and 40 genomes with randomly selected reference strains and the two query RAYTs  
406 (yafM\_Ecoli and yafM\_SBW25). For a given number N of submitted genomes of average  
407 sequence length L (in megabases), a RAREFAN run completes in approximately  $T = (8-10 \text{ seconds})$   
408  $* N * L$  on our moderate server hardware (4 CPU cores, 16 GB shared RAM) (**Supplementary**  
409 **Figure 3 and 4**).

#### 410 **Discussion**

411 RAREFAN allows users to quickly detect REPIN populations and RAYT transposases inside  
412 bacterial genomes. It also links the RAYT transposase genes to the REPIN population it duplicates.  
413 These data help the user to study REPIN-RAYT dynamics in their strains of interest without a  
414 dedicated bioinformatician, and hence will render REPIN-RAYT systems widely accessible.

415 One limitation of RAREFAN is that REPINs can only be identified in genomes when they are  
416 symmetric (**Figure 1**). Symmetric REPINs have seed sequences that can morph into each other by  
417 a series of single substitutions (intermediate sequences need to be present in the genome). A  
418 REPIN consists of a 5' and a 3' REP sequence. If one of these REP sequences contains an insertion  
419 or deletion, which the other REP sequence does not contain then RAREFAN will not recognize the  
420 second repeat of the seed sequence. In this case, RAREFAN will not be able to identify REPINs but

421 can still be used to analyze REP singlet populations. To date, the only known asymmetric REPIN  
422 populations are found in *E. coli*. However, it is likely that asymmetric REPINs also exist in other  
423 microbial species.

424 RAREFAN sometimes cannot correctly divide REPINs into REPIN groups. Either because REPINs  
425 from different groups occur in close proximity in the genome, an issue that can easily be solved  
426 by adjusting a RAREFAN parameter, or because two REPIN groups are very closely related (**Figure**  
427 **6**). Unfortunately, RAREFAN is not able to automatically detect and resolve the assignment of  
428 closely related REPINs into groups yet. Hence it is advisable to manually check associations  
429 between REPIN groups and RAYT genes by analyzing the composition of REPIN groups.

430 In the future we aim to make RAREFAN even more versatile and easier to use by, for example,  
431 automatically integrating data from public databases such as Genbank, and integrating RAREFAN  
432 into workflows such as Galaxy (Afgan *et al.* 2018).

433 RAREFAN makes the study of REPIN-RAYT systems more accessible to any biologist or  
434 bioinformatician interested in studying intragenomic sequence populations. Our tool will help  
435 understand the purpose and evolution of REPIN-RAYT systems in bacterial genomes.

#### 436 **Acknowledgements**

437 We would like to thank Prajwal Bharadwaj for assisting us with the sequence analysis and Jenna  
438 Gallie for valuable feedback on the manuscript.

#### 439 **References**

440 Afgan E, Baker D, Batut B, van den Beek M, Bouvier D, Cech M, Chilton J, Clements D, Coraor N,  
441 Grüning BA, Guerler A, Hillman-Jackson J, Hiltemann S, Jalili V, Rasche H, Soranzo N,  
442 Goecks J, Taylor J, Nekrutenko A, Blankenberg D (2018) The Galaxy platform for  
443 accessible, reproducible and collaborative biomedical analyses: 2018 update. *Nucleic*  
444 *Acids Res.*, **46**, W537-W544-W537–W544. <https://doi.org/10.1093/nar/gky379>



- 445 Altschul SF, Gish W, Miller W, Myers EW, Lipman DJ (1990) Basic local alignment search tool.  
446 *Journal of Molecular Biology*, **215**, 403–410. <https://doi.org/10.1006/jmbi.1990.9999>
- 447 Arnold K, Gosling J, Holmes D (2005) *The Java programming language*. Addison Wesley  
448 Professional.
- 449 Bertels F, Gallie J, Rainey PB (2017) Identification and Characterization of Domesticated Bacterial  
450 Transposases. *Genome Biology and Evolution*, **9**, 2110–2121.  
451 <https://doi.org/10.1093/gbe/evx146>
- 452 Bertels F, Gokhale CS, Traulsen A (2017) Discovering Complete Quasispecies in Bacterial  
453 Genomes. *Genetics*, **206**, 2149–2157. <https://doi.org/10.1534/genetics.117.201160>
- 454 Bertels F, Rainey PB (2011a) Within-Genome Evolution of REPINs: a New Family of Miniature  
455 Mobile DNA in Bacteria. *PLoS genetics*, **7**, e1002132.  
456 <https://doi.org/10.1371/journal.pgen.1002132>
- 457 Bertels F, Rainey PB (2011b) Curiosities of REPINs and RAYTs. *Mobile Genetic Elements*, **1**, 262–  
458 268. <https://doi.org/10.4161/mge.18610>
- 459 Bertels F, Rainey PB (2022) Ancient Darwinian replicators nested within eubacterial genomes. ,  
460 2021.07.10.451892. <https://doi.org/10.1101/2021.07.10.451892>
- 461 Bichsel M, Barbour AD, Wagner A (2010) The early phase of a bacterial insertion sequence  
462 infection. *Theoretical Population Biology*. <https://doi.org/10.1016/j.tpb.2010.08.003>
- 463 Camacho C, Coulouris G, Avagyan V, Ma N, Papadopoulos J, Bealer K, Madden TL (2009) BLAST+:  
464 architecture and applications. *BMC Bioinformatics*, **10**, 421–9.  
465 <https://doi.org/10.1186/1471-2105-10-421>

- 466 van Dijk B, Bertels F, Stolk L, Takeuchi N, Rainey PB (2022) Transposable elements promote the  
467 evolution of genome streamlining. *Philosophical Transactions of the Royal Society B:*  
468 *Biological Sciences*, **377**, 20200477. <https://doi.org/10.1098/rstb.2020.0477>
- 469 Edgar RC (2004) MUSCLE: multiple sequence alignment with high accuracy and high throughput.  
470 *Nucleic Acids Research*, **32**, 1792–1797. <https://doi.org/10.1093/nar/gkh340>
- 471 Felsenstein J (1985) Phylogenies and the comparative method. *American Naturalist*, 1–15.
- 472 Grinberg M (2018) *Flask web development: developing web applications with python*. O'Reilly  
473 Media, Inc.
- 474 Guindon S, Dufayard J-F, Lefort V, Anisimova M, Hordijk W, Gascuel O (2010) New algorithms and  
475 methods to estimate maximum-likelihood phylogenies: assessing the performance of  
476 PhyML 3.0. *Systematic Biology*, **59**, 307–321. <https://doi.org/10.1093/sysbio/syq010>
- 477 Haubold B, Klötzl F, Pfaffelhuber P (2015) andi: fast and accurate estimation of evolutionary  
478 distances between closely related genomes. *Bioinformatics*, **31**, 1169–1175.  
479 <https://doi.org/10.1093/bioinformatics/btu815>
- 480 Higgins CF, Ames GF, Barnes WM, Clement JM, Hofnung M (1982) A novel intercistronic  
481 regulatory element of prokaryotic operons. *Nature*, **298**, 760–762.  
482 <https://doi.org/10.1038/298760a0>
- 483 Initiative TOS (2021) The MIT License.
- 484 Kearse M, Moir R, Wilson A, Stones-Havas S (2012) Geneious Basic: an integrated and extendable  
485 desktop software platform for the organization and analysis of sequence data. ....
- 486 Kleinmann SG, Rudolph S, Vila S, Rodin J, Peña JF-S (2021) *The Debian GNU/Linux Operating*  
487 *System Manual*.

- 488 Lawrence JG, Ochman H, Hartl DL (1992) The evolution of insertion sequences within enteric  
489 bacteria. *Genetics*, **131**, 9–20. <https://doi.org/10.1093/genetics/131.1.9>
- 490 Nunvar J, Huckova T, Licha I (2010) Identification and characterization of repetitive extragenic  
491 palindromes (REP)-associated tyrosine transposases: implications for REP evolution and  
492 dynamics in bacterial genomes. *BMC Genomics*, **11**, 44. [https://doi.org/10.1186/1471-](https://doi.org/10.1186/1471-2164-11-44)  
493 [2164-11-44](https://doi.org/10.1186/1471-2164-11-44)
- 494 Park HJ, Gokhale CS, Bertels F (2021) How sequence populations persist inside bacterial genomes.  
495 *Genetics*, **217**. <https://doi.org/10.1093/genetics/iyab027>
- 496 R Core Team (2016) R: A Language and Environment for Statistical Computing.
- 497 Rankin DJ, Bichsel M, Wagner A (2010) Mobile DNA can drive lineage extinction in prokaryotic  
498 populations. *Journal of Evolutionary Biology*. [https://doi.org/10.1111/j.1420-](https://doi.org/10.1111/j.1420-9101.2010.02106.x)  
499 [9101.2010.02106.x](https://doi.org/10.1111/j.1420-9101.2010.02106.x)
- 500 RStudio, Inc (2013) Easy web applications in R.
- 501 Rutherford K, Parkhill J, Crook J, Horsnell T, Rice P, Rajandream MA, Barrell B (2000) Artemis:  
502 sequence visualization and annotation. *Bioinformatics*, **16**, 944–945.  
503 <https://doi.org/10.1093/bioinformatics/16.10.944>
- 504 Sawyer SA, Dykhuizen DE, DuBose RF, Green L, Mutangadura-Mhlanga T, Wolczyk DF, Hartl DL  
505 (1987) Distribution and Abundance of Insertion Sequences Among Natural Isolates of  
506 *Escherichia coli*. *Genetics*, **115**, 51–63. <https://doi.org/10.1093/genetics/115.1.51>
- 507 Ton-Hoang B, Siguier P, Quentin Y, Onillon S, Marty B, Fichant G, Chandler M (2012) Structuring  
508 the bacterial genome: Y1-transposases associated with REP-BIME sequences. *Nucleic*  
509 *Acids Research*, **40**, 3596–3609. <https://doi.org/10.1093/nar/gkr1198>

- 510 Van Dongen S (2000) A cluster algorithm for graphs. *Report-Information systems*, 1–40.
- 511 Van Rossum G, Drake Jr FL (1995) *Python reference manual*. Centrum voor Wiskunde en  
512 Informatica Amsterdam.
- 513 Wu Y, Aandahl RZ, Tanaka MM (2015) Dynamics of bacterial insertion sequences: can  
514 transposition bursts help the elements persist? *BMC Evolutionary Biology*, **15**, 288–12.  
515 <https://doi.org/10.1186/s12862-015-0560-5>
- 516 Yu G, Lam TT-Y, Zhu H, Guan Y (2018) Two Methods for Mapping and Visualizing Associated Data  
517 on Phylogeny Using Ggtree. (FU Battistuzzi, Ed.). *Molecular biology and evolution*, **35**,  
518 3041–3043. <https://doi.org/10.1093/molbev/msy194>
- 519
- 520

## 521 Supplementary Figures

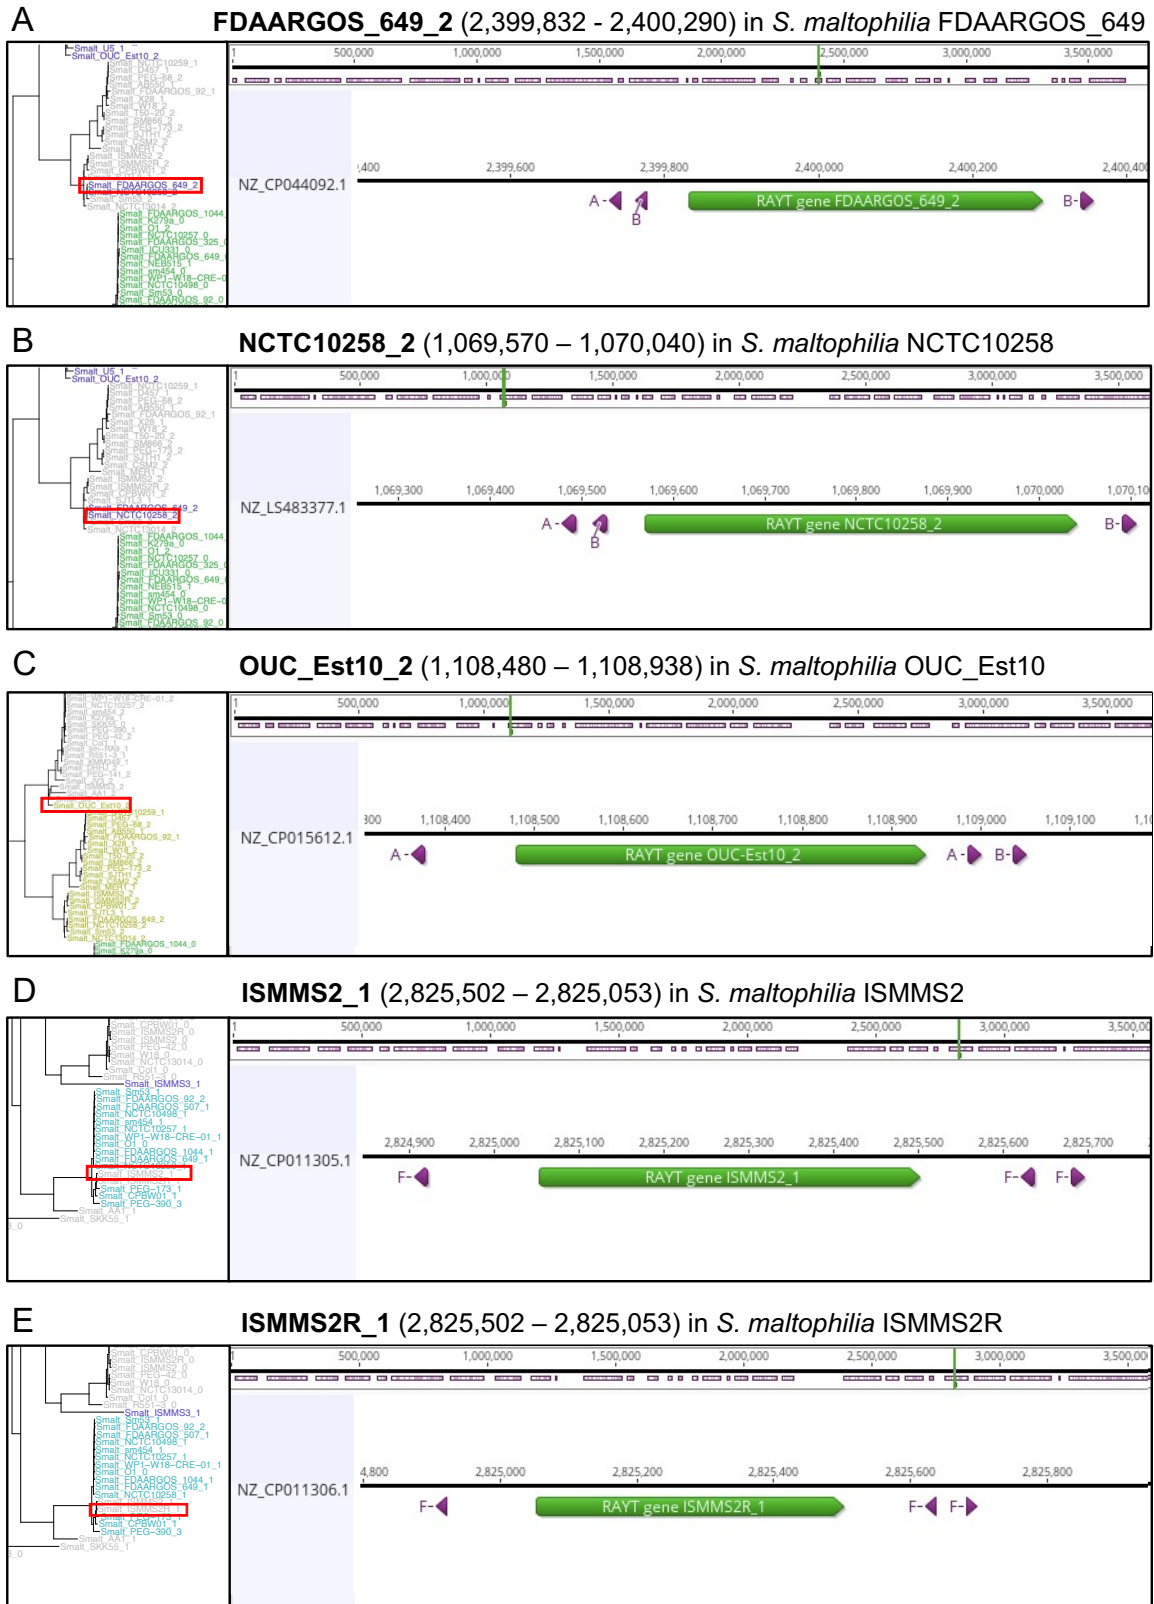

523 **Supplementary Figure 1. Sequence analysis shows REPIN groups are indeed associated with**  
524 **monophyletic RAYTs.** Non-monophyletic or missing associations to REPIN populations identified  
525 by RAREFAN were investigated in the corresponding genomes using Geneious (Kearse *et al.*  
526 2012). Red boxes mark the position of the atypical RAYT that is being analyzed in detail. Mapping  
527 of REPIN palindromes A-I (with zero mismatches) shows FDAARGOS\_649\_2 (A), NCTC10258\_2  
528 (B), and OUC\_Est\_2 (C) are linked to the wrong REPIN group because REP singlets that are  
529 ordinarily linked to a RAYT sister clade are found in close proximity to the RAYT. These wrong  
530 associations between REPIN and RAYT usually occur when the correct REPIN population is absent  
531 from the reference genome. ISMMS2R\_1 (D) and ISMMS2\_1 (E) were not linked to REPIN  
532 population by RAREFAN because the corresponding seed sequences were located at a distance  
533 of more than 130 bp from the RAYT gene. Nucleotide sequences and positions were extracted  
534 from output files generated by RAREFAN. Complete genome sequences are available in NCBI  
535 Nucleotide Database using Accessions: (A) NZ\_CP044092.1, (B) NZ\_LS483377.1, (C)  
536 NZ\_CP015612.1, (D) NZ\_CP011306.1, (E) NZ\_CP011305.1.

### ISMMS3\_1 (3,080,683 – 3,080,246) in *S. maltophilia* ISMMS3

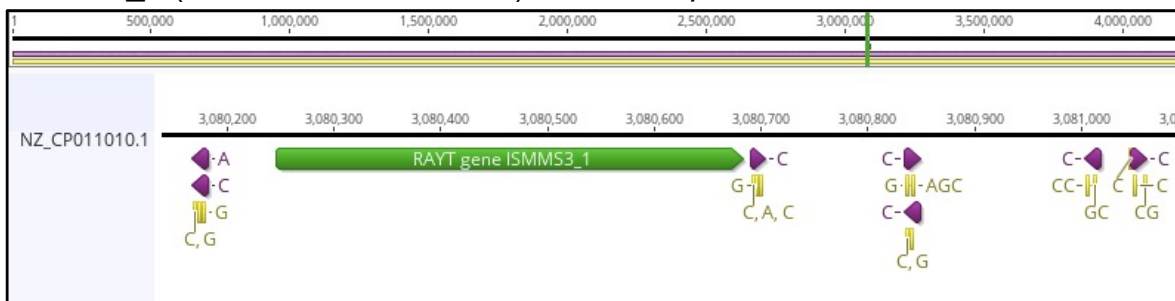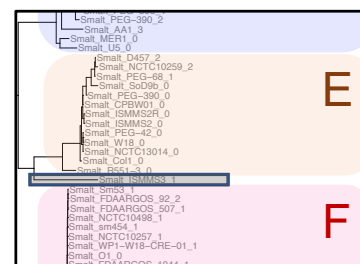

537

538 **Supplementary Figure 2. RAYT gene ISMMS3\_1 cannot be linked to a REPIN population.** The  
539 sequence of the RAYT gene ISMMS3\_1 and its flanking sequences were analysed in Geneious  
540 (Kearse *et al.* 2012). The inset shows the location of ISMMS3\_1 in the RAYT phylogeny (grey box).  
541 When mapping all of the identified palindromes to the RAYT region and allowing up to four  
542 mismatches (yellow annotations), various mutants of palindrome C were found in close proximity  
543 of the RAYT gene. However, we could not identify a corresponding REPIN population, which may  
544 indicate that the population has not yet expanded in the genome.

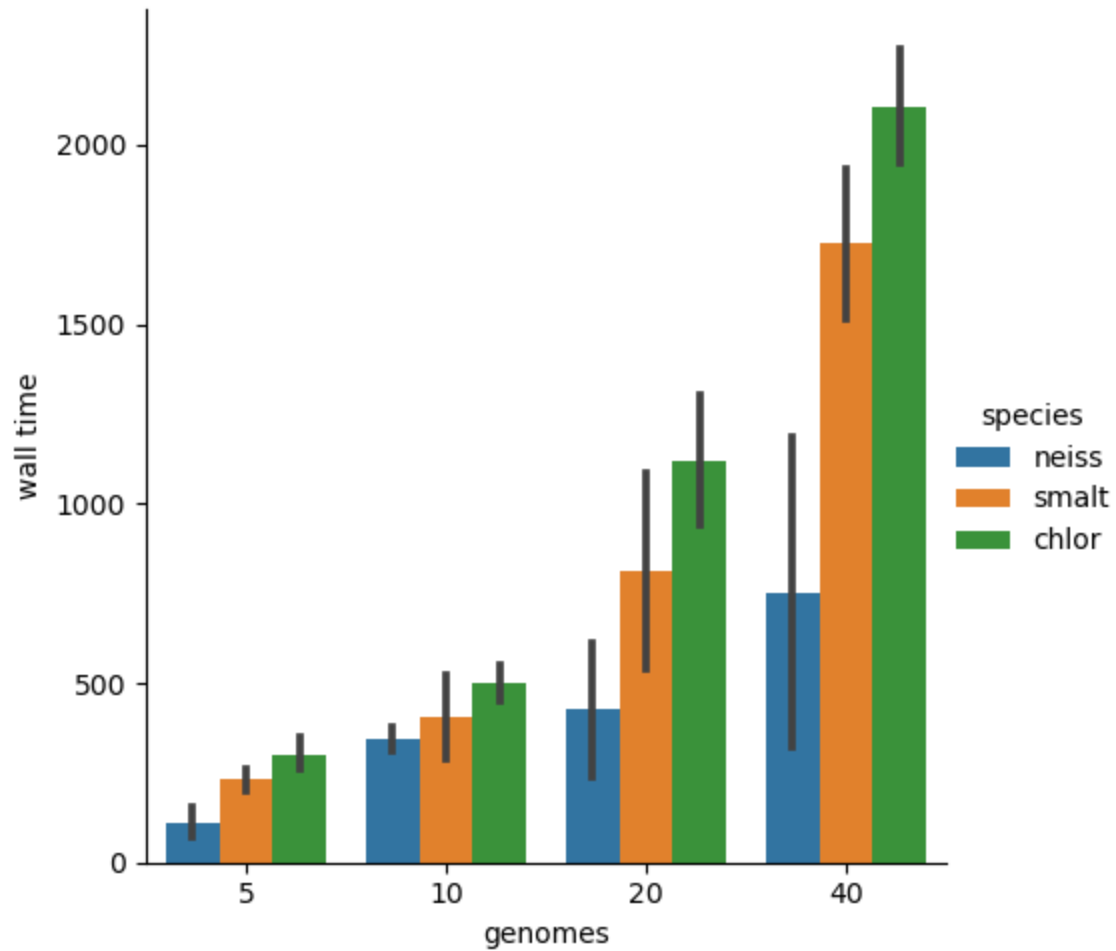

545  
546 **Supplementary Figure 3.** Average time (in seconds) it takes RAREFAN to complete for different  
547 genome numbers from three bacterial species (*N. meningitidis*, *N. gonorrhoeae*, *S. maltophilia*,  
548 *Pseudomonas chlororaphis*). Black bars indicate the 95% CI across four runs, where two runs  
549 share the same query RAYT. For each run reference and query strains were randomly selected.  
550 All measurements were performed on 4CPU cores with 16 GB of shared memory.

551

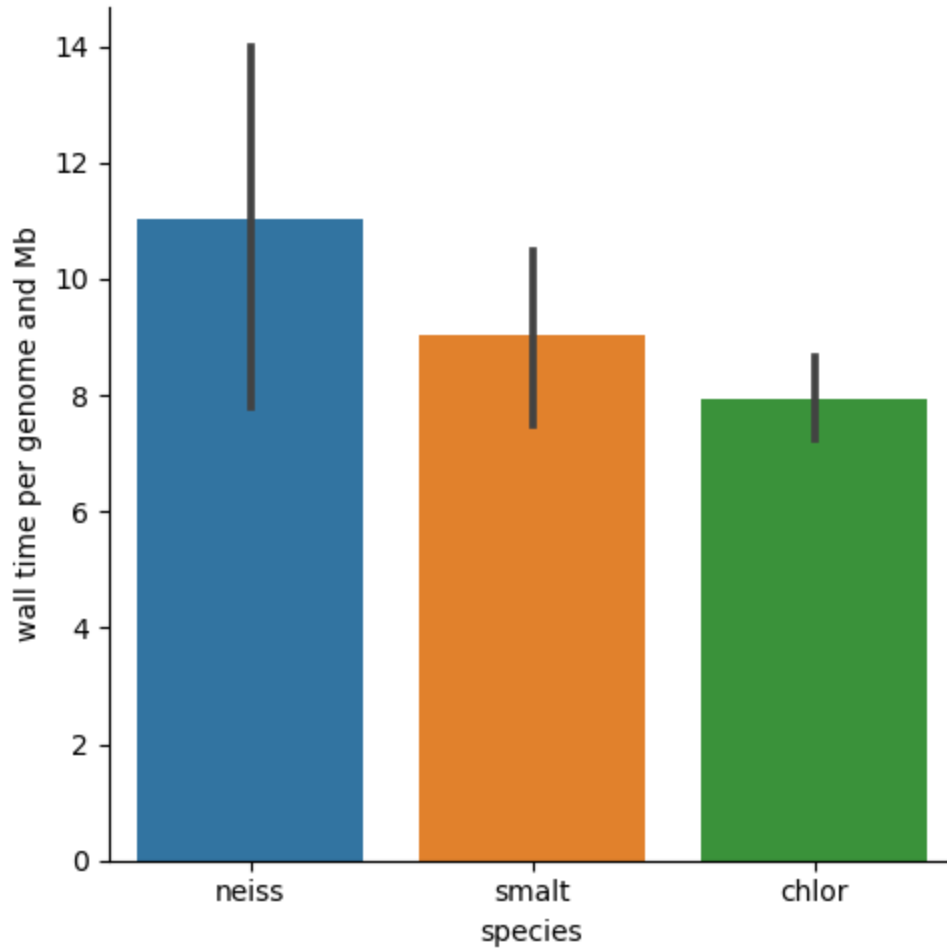

552

553 **Supplementary Figure 4.** Approximate elapsed run time per megabase sequence length  
554 calculated from the same runtime data generated in **Supplementary Figure 3.**

555

556
